# Supplementary material for: Use of concept mapping to characterize relationships among implementation strategies and assess their feasibility and importance: results from the Expert Recommendations for Implementing Change (ERIC) study
Source: Springer Nature journal article supplement (doi:10.1186/s13012-015-0295-0), 2015-08-06

# Point Map

Strategies commonly sorted together as similar are physically closer to one another in the graphic below.

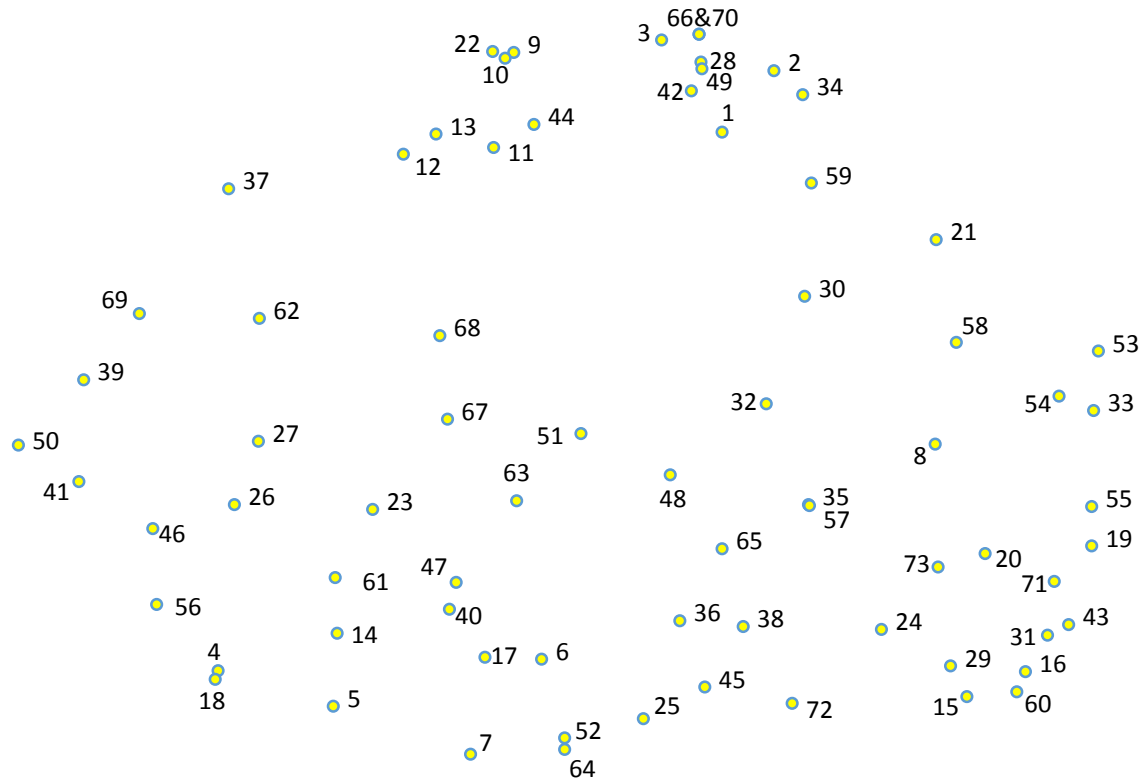

# Final Solution

Strategies were clustered together by physical proximity into categories. Each cluster will be discussed in subsequent pages

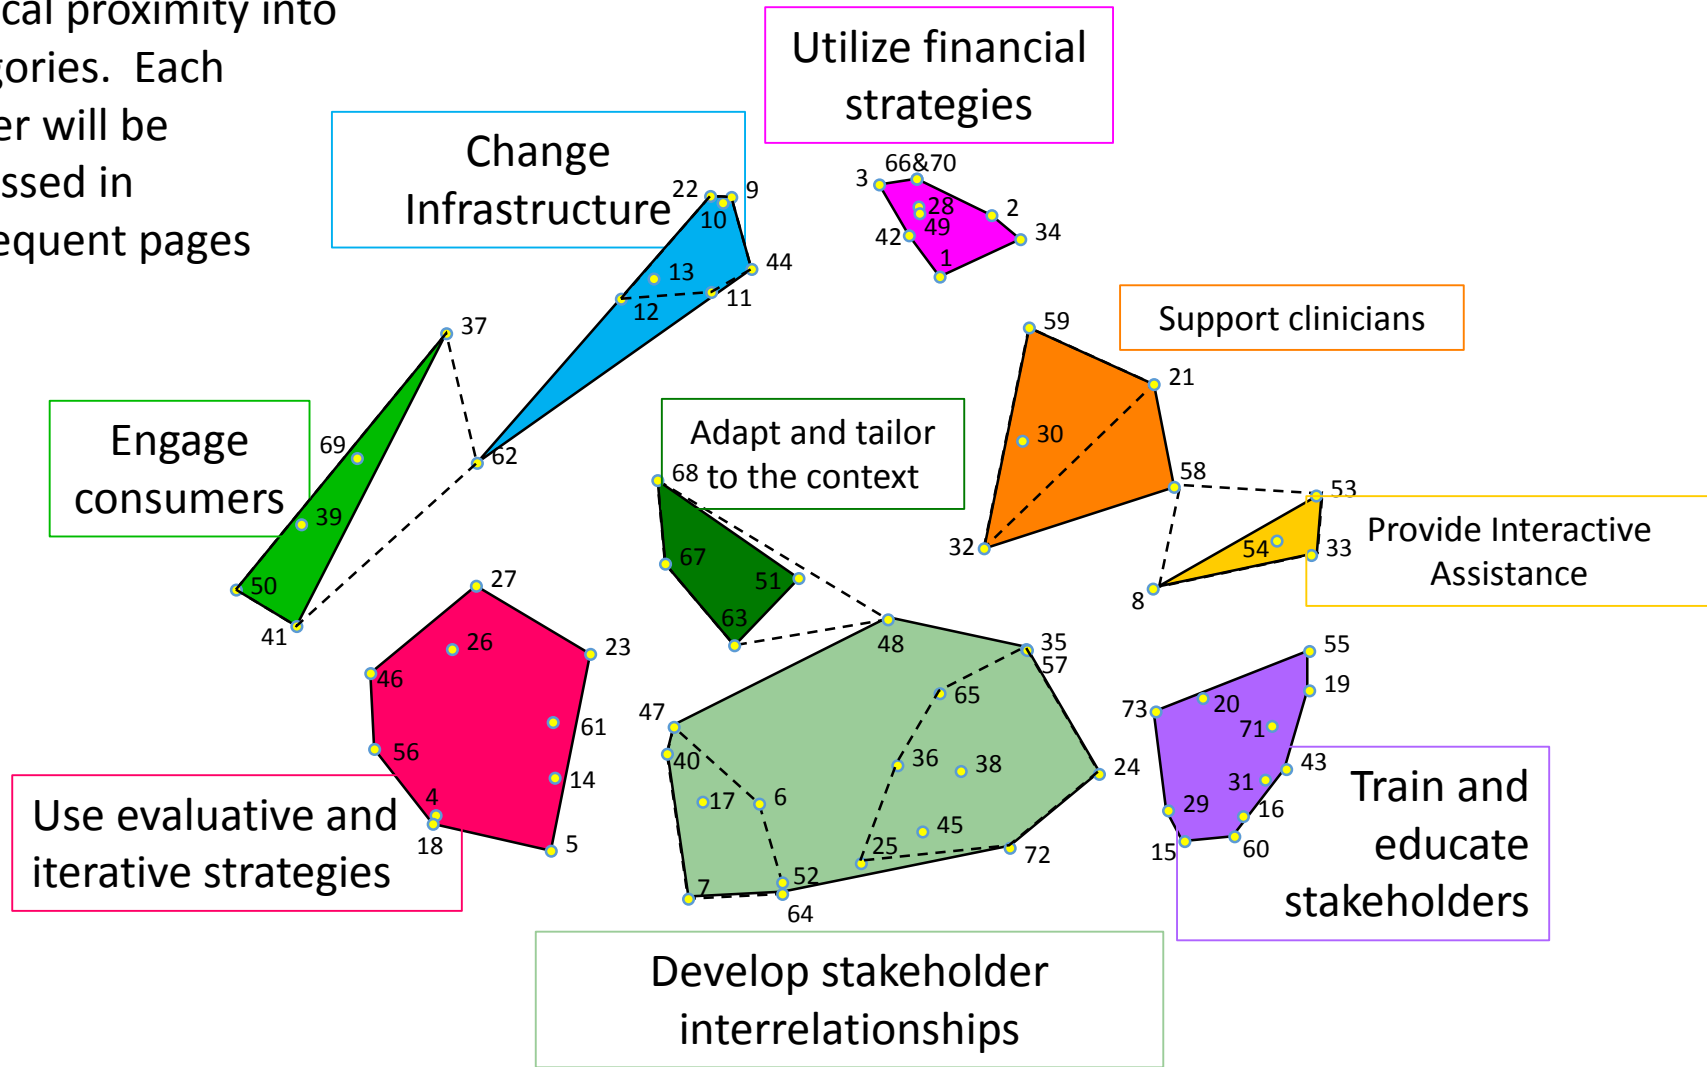

# Use Evaluative and Iterative Strategies

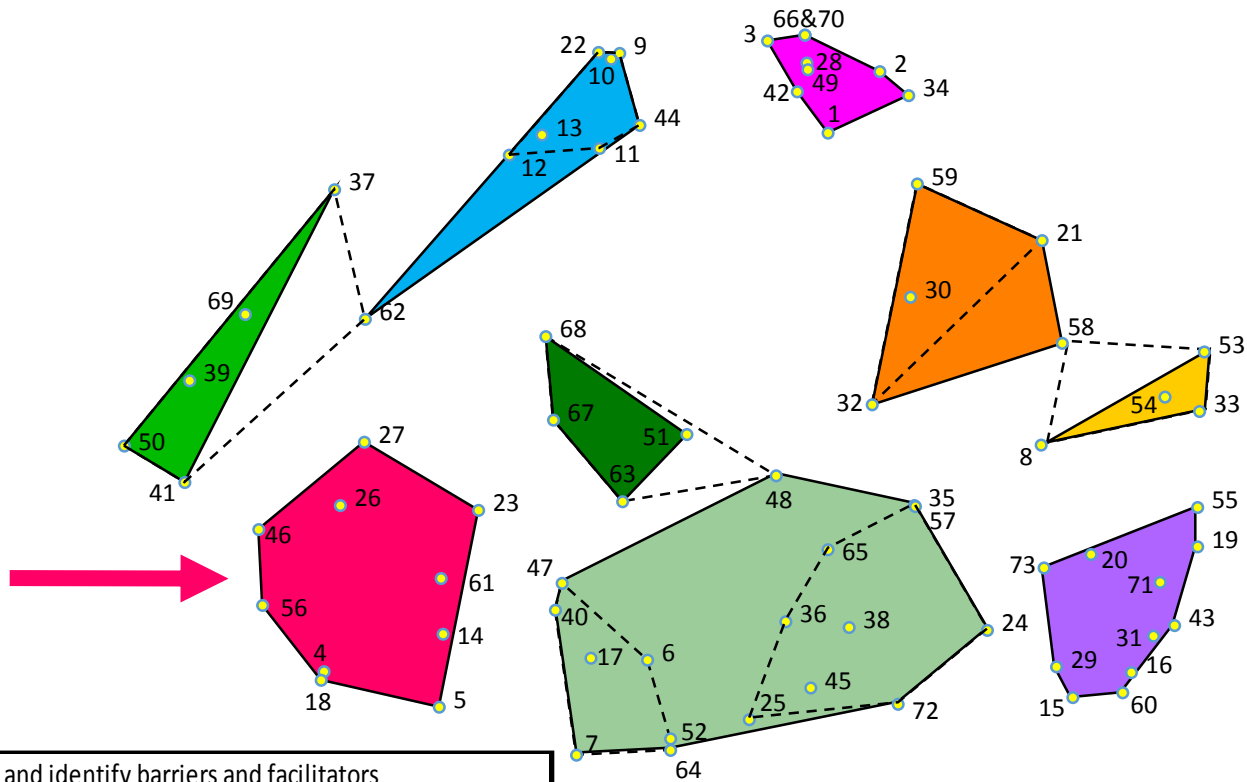

|                                                               |
|---------------------------------------------------------------|
| 4 Assess for readiness and identify barriers and facilitators |
| 5 Audit and provide feedback                                  |
| 14 Conduct cyclical small tests of change                     |
| 18 Conduct local needs assessment                             |
| 23 Develop a formal implementation blueprint                  |
| 61 Stage implementation scale up                              |

|                                                          |
|----------------------------------------------------------|
| 26 Develop and implement tools for quality monitoring    |
| 27 Develop and organize quality monitoring systems       |
| 46 Obtain and use patients/consumers and family feedback |
| 56 Purposefully reexamine the implementation             |

# Provide Interactive Assistance

|    |                                    |
|----|------------------------------------|
| 8  | Centralize technical assistance    |
| 33 | Facilitation                       |
| 53 | Provide clinical supervision       |
| 54 | Provide local technical assistance |

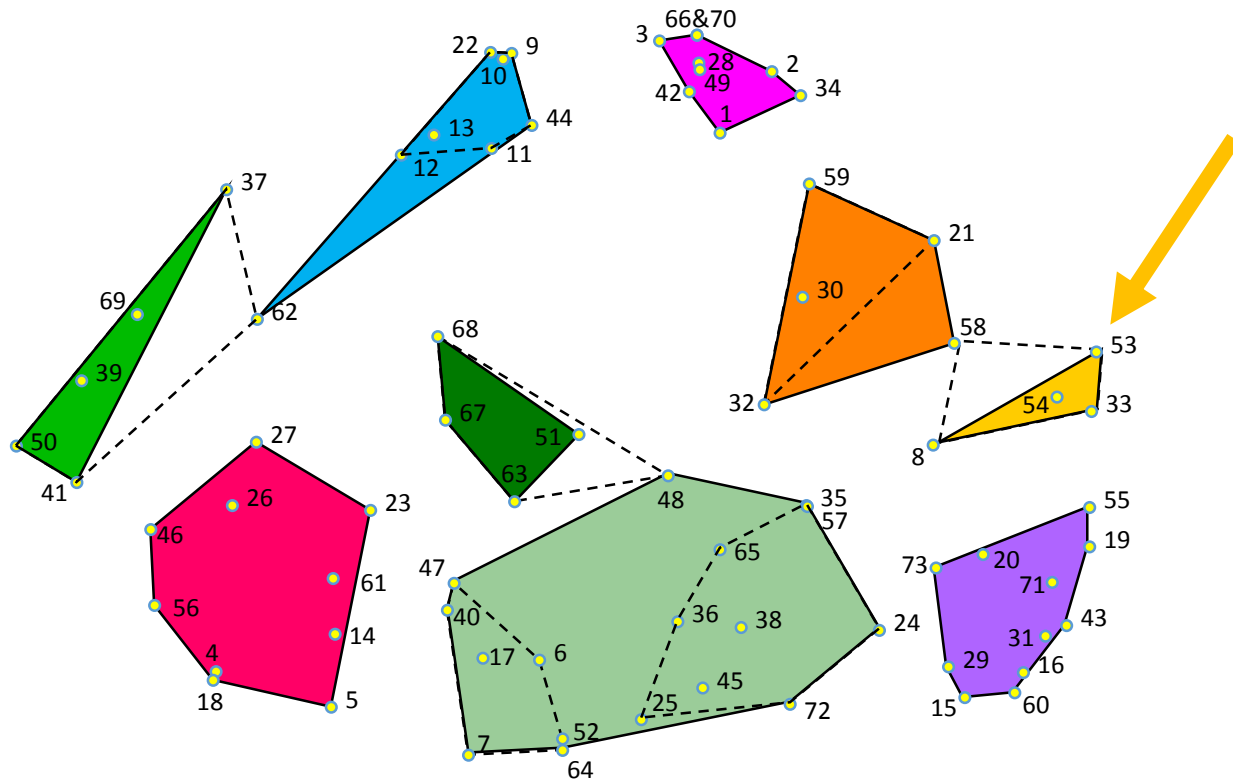

# Adapt and Tailor to the Context

|                                    |
|------------------------------------|
| 51 Promote adaptability            |
| 63 Tailor strategies               |
| 67 Use data experts                |
| 68 Use data warehousing techniques |

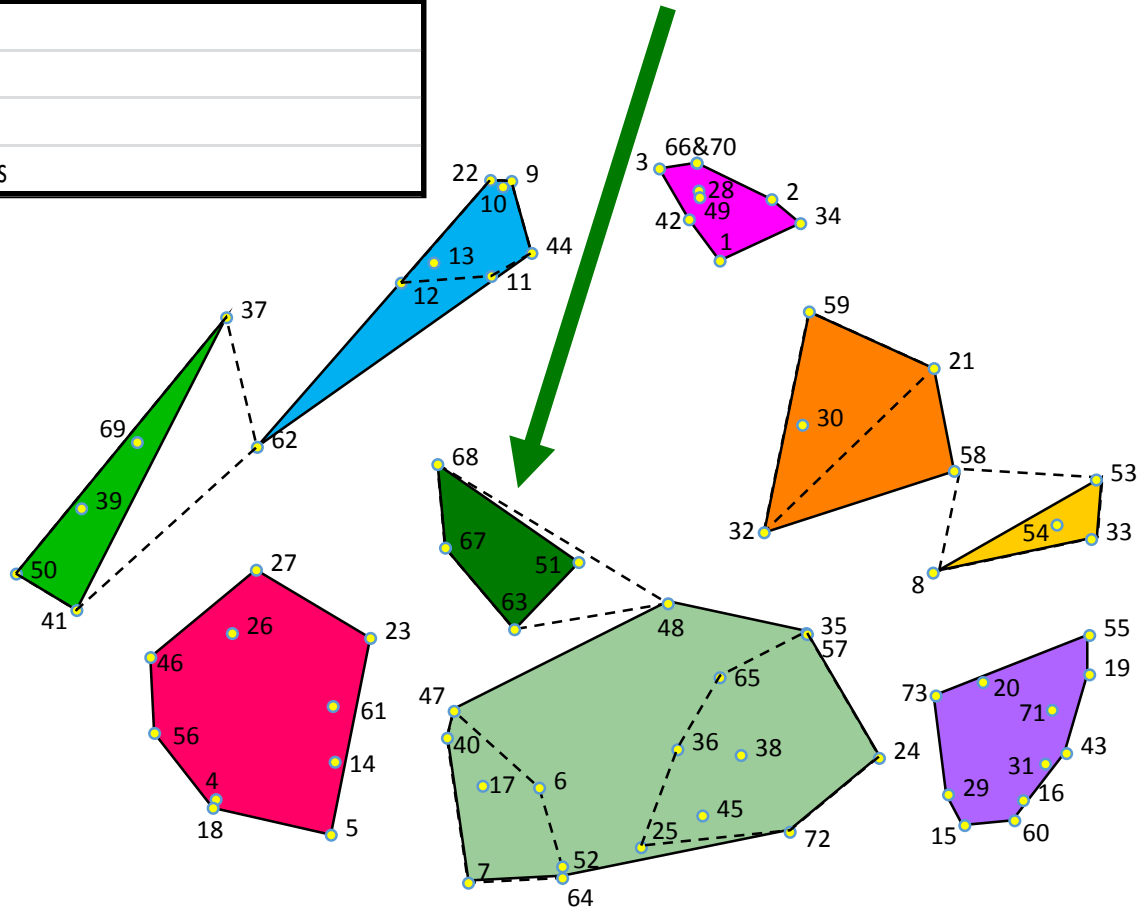

# Develop Stakeholder Interrelationships

|    |                                     |
|----|-------------------------------------|
| 6  | Build a coalition                   |
| 7  | Capture and share local knowledge   |
| 17 | Conduct local consensus discussions |
| 40 | Involve executive boards            |
| 47 | Obtain formal commitments           |
| 52 | Promote network weaving             |
| 64 | Use advisory boards and workgroups  |

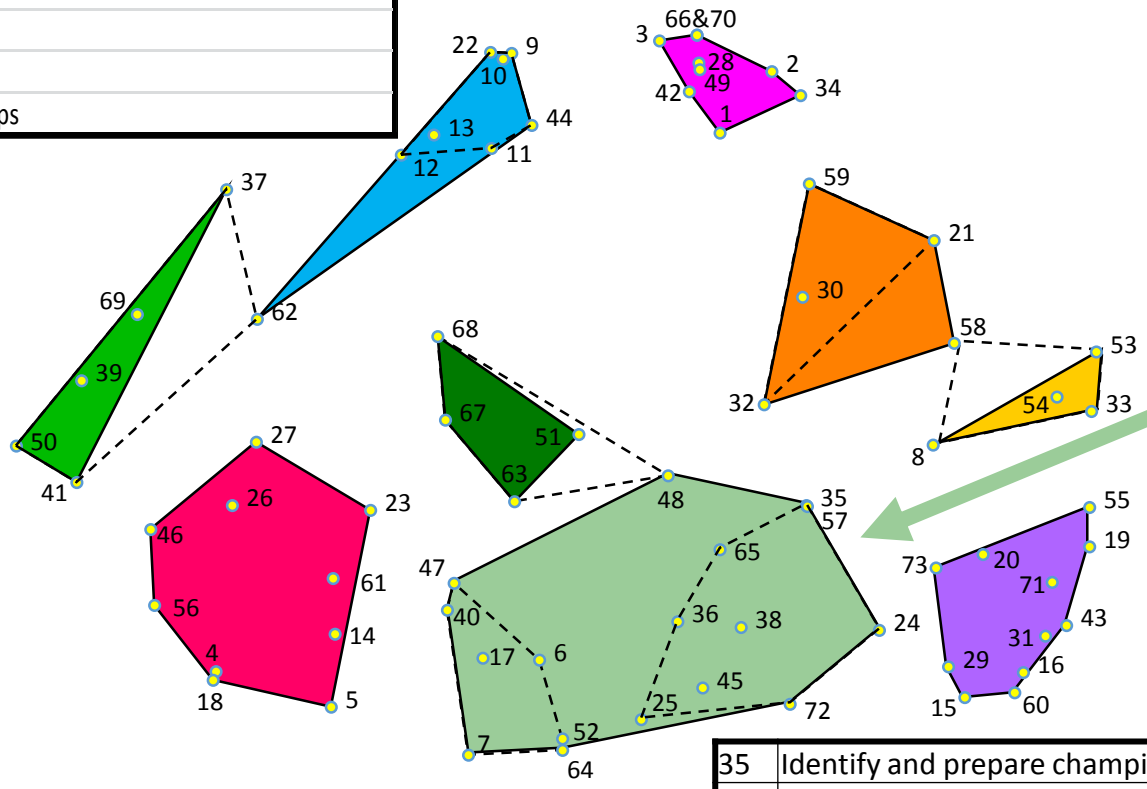

|    |                                    |
|----|------------------------------------|
| 24 | Develop academic partnerships      |
| 25 | Develop an implementation glossary |
| 36 | Identify early adopters            |
| 38 | Inform local opinion leaders       |

|    |                                                 |
|----|-------------------------------------------------|
| 35 | Identify and prepare champions                  |
| 45 | Model and simulate change                       |
| 48 | Organize clinician implementation team meetings |
| 57 | Recruit, designate, and train for leadership    |
| 65 | Use an implementation advisor                   |
| 72 | Visit other sites                               |

# Train and Educate Stakeholders

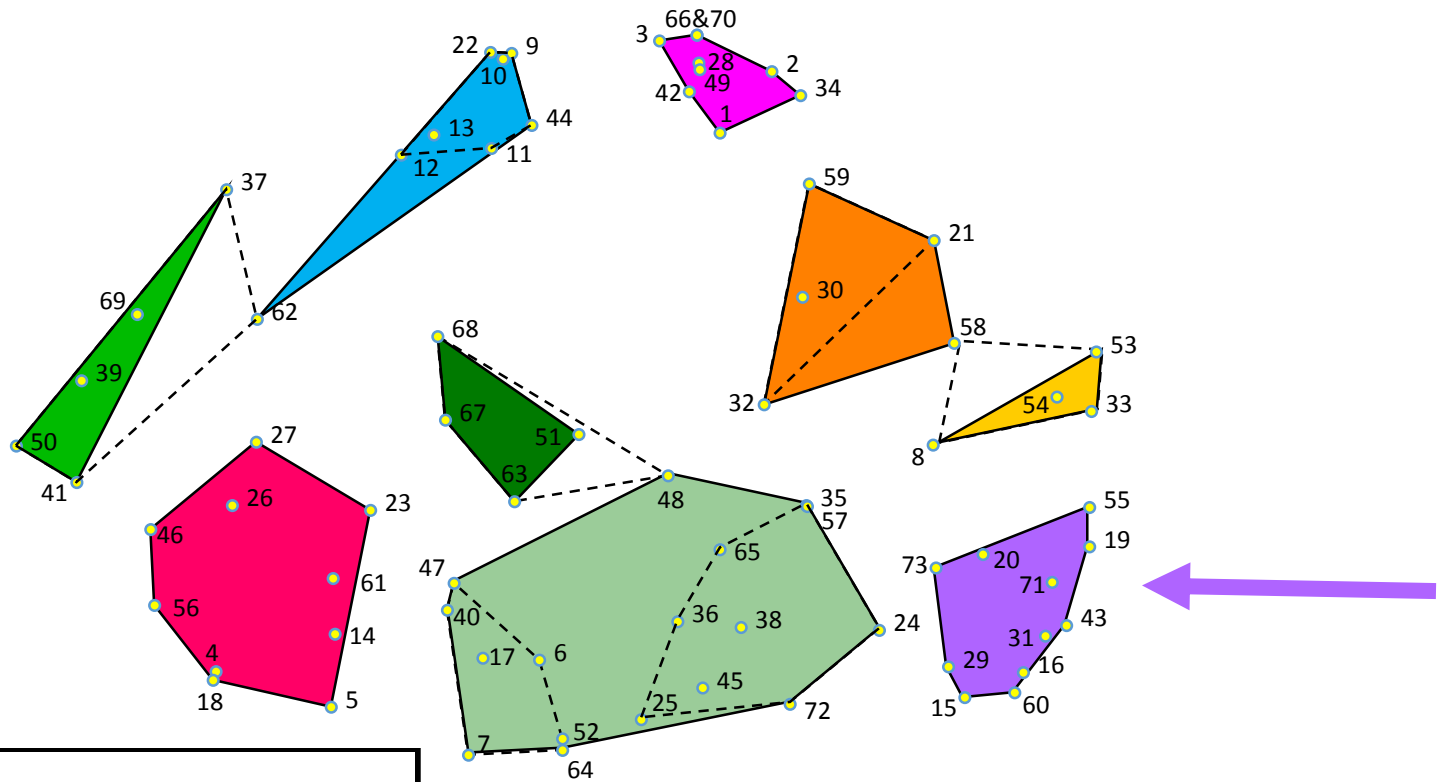

|    |                                     |
|----|-------------------------------------|
| 15 | Conduct educational meetings        |
| 16 | Conduct educational outreach visits |
| 29 | Develop educational materials       |
| 60 | Shadow other experts                |
| 19 | Conduct ongoing training            |
| 20 | Create a learning collaborative     |

|    |                                    |
|----|------------------------------------|
| 31 | Distribute educational materials   |
| 43 | Make training dynamic              |
| 55 | Provide ongoing consultation       |
| 71 | Use train-the-trainer strategies   |
| 73 | Work with educational institutions |

# Support Clinicians

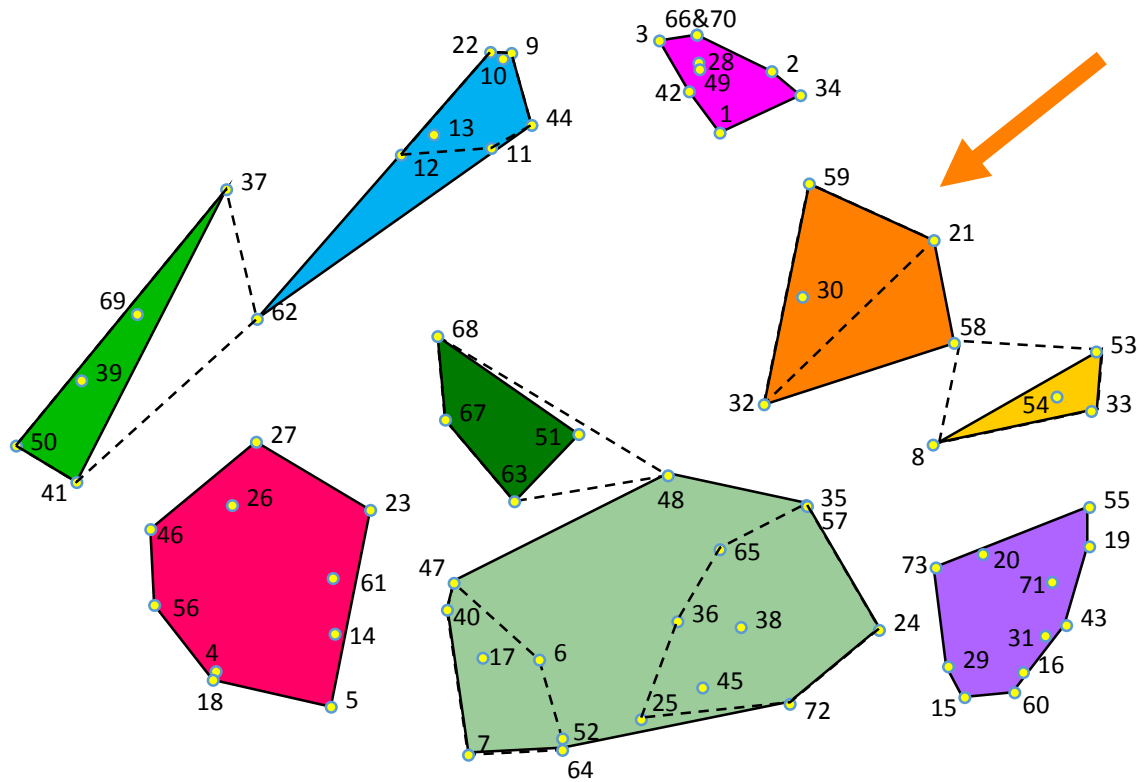

|    |                                                |
|----|------------------------------------------------|
| 21 | Create new clinical teams                      |
| 30 | Develop resource sharing agreements            |
| 32 | Facilitate relay of clinical data to providers |
| 58 | Remind clinicians                              |
| 59 | Revise professional roles                      |



# Engage Consumers

|    |                                                                   |
|----|-------------------------------------------------------------------|
| 37 | Increase demand                                                   |
| 39 | Intervene with patients/consumers to enhance uptake and adherence |
| 41 | Involve patients/consumers and family members                     |
| 50 | Prepare patients/consumers to be active participants              |
| 69 | Use mass media                                                    |

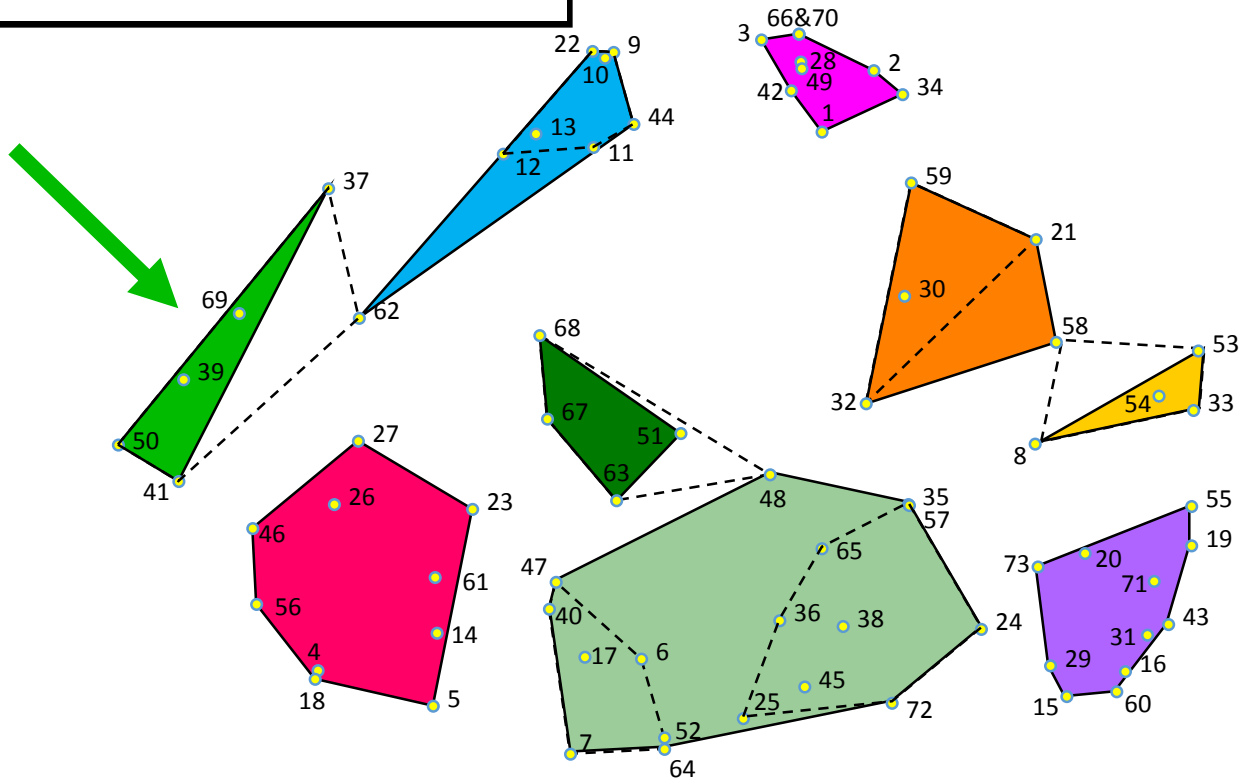

# Utilize Financial Strategies

|    |                                               |
|----|-----------------------------------------------|
| 1  | Access new funding                            |
| 2  | Alter incentive/allowance structures          |
| 3  | Alter patient/consumer fees                   |
| 28 | Develop disincentives                         |
| 34 | Fund and contract for the clinical innovation |

|    |                                                       |
|----|-------------------------------------------------------|
| 42 | Make billing easier                                   |
| 49 | Place innovation on fee for service lists/formularies |
| 66 | Use capitated payments                                |
| 70 | Use other payment schemes                             |

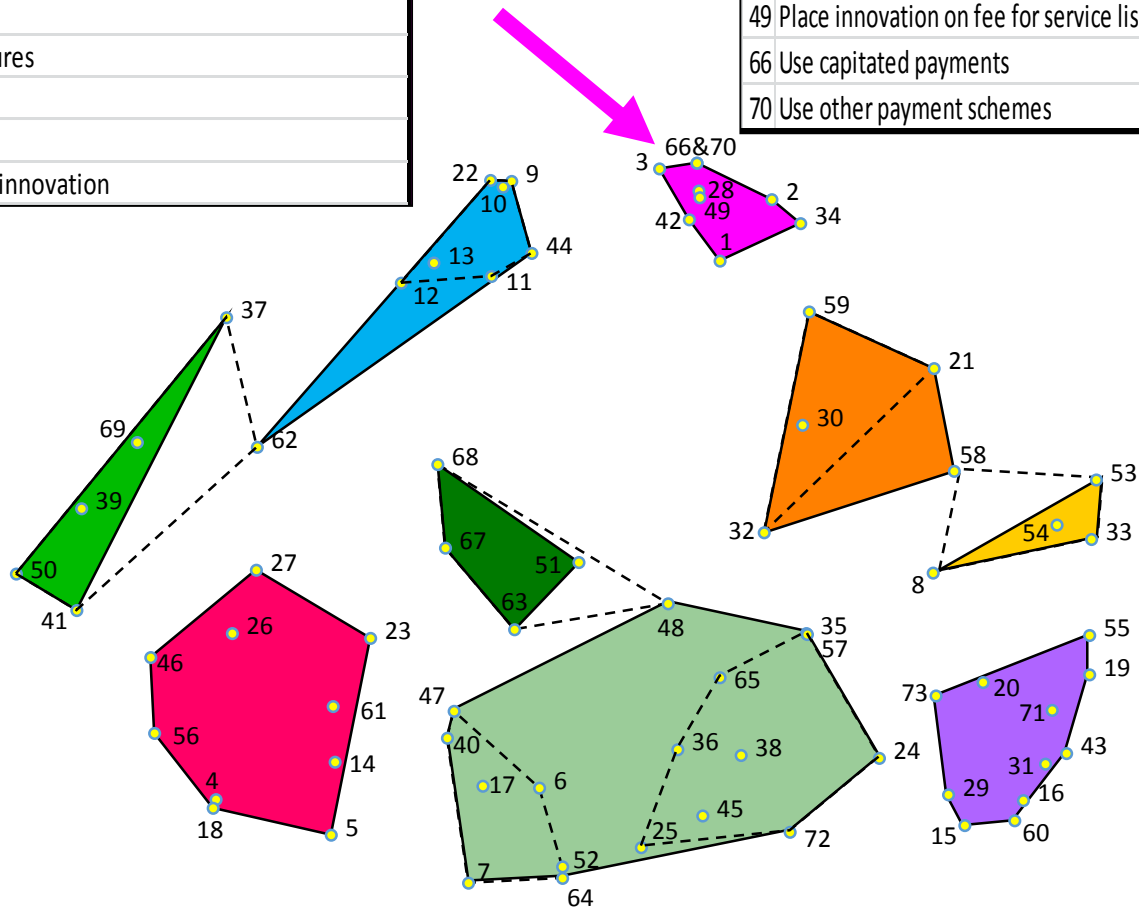

# Change Infrastructure

|    |                                                           |
|----|-----------------------------------------------------------|
| 9  | Change accreditation or membership requirements           |
| 10 | Change liability laws                                     |
| 11 | Change physical structure and equipment                   |
| 12 | Change record systems                                     |
| 13 | Change service sites                                      |
| 22 | Create or change credentialing and/or licensure standards |
| 44 | Mandate change                                            |
| 62 | Start a dissemination organization                        |

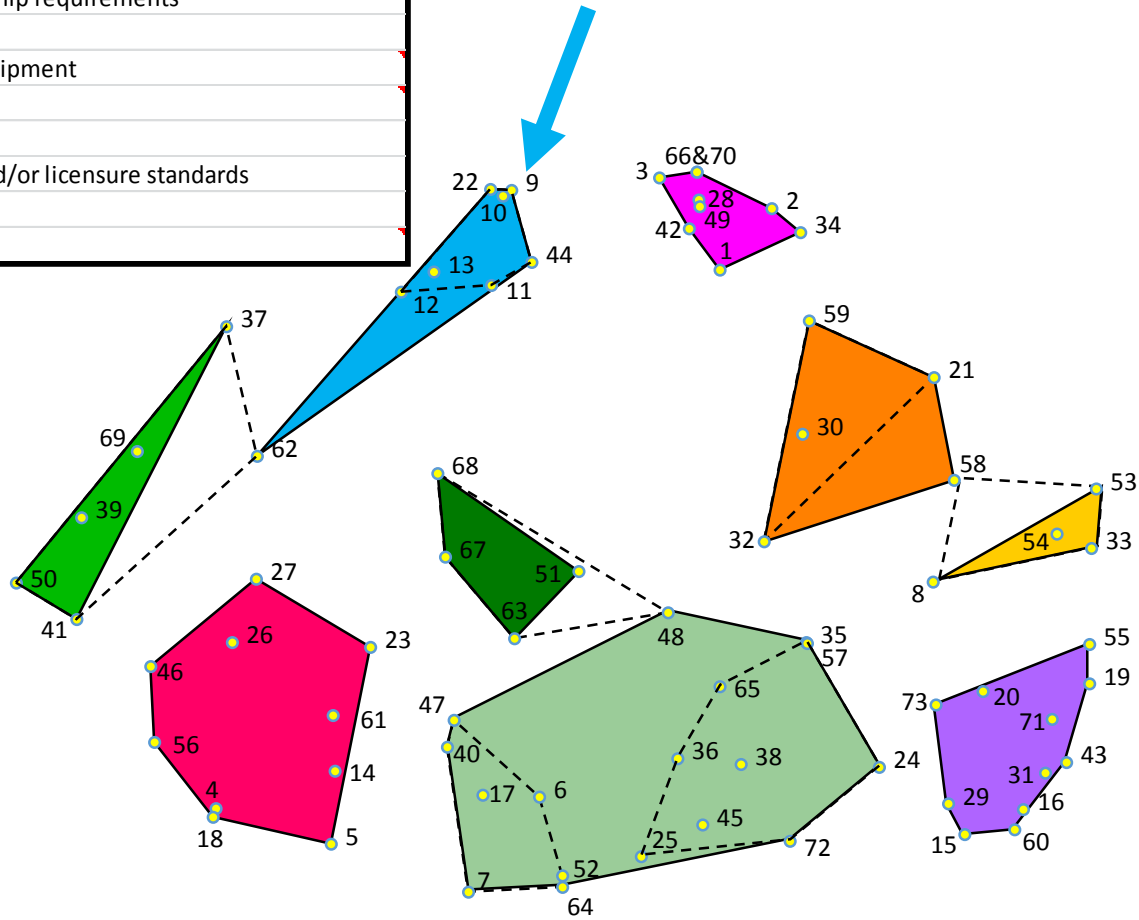

# Go Zone Overview

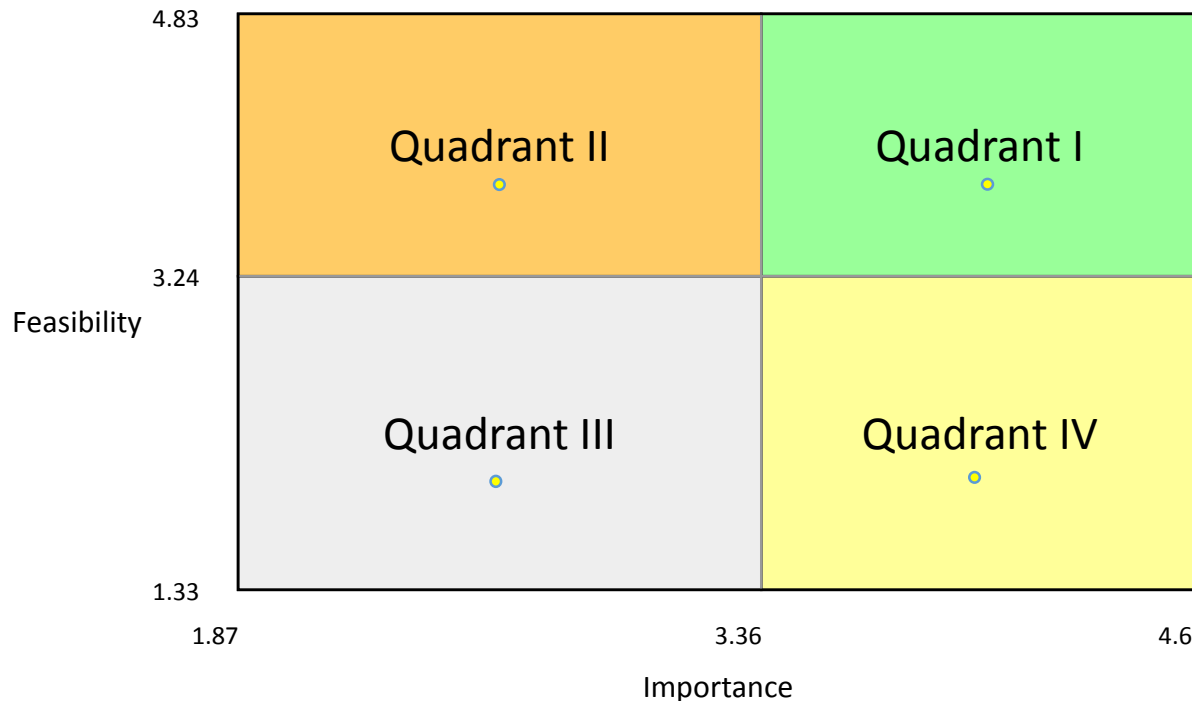

| Rating Scale Anchors |                                               |
|----------------------|-----------------------------------------------|
| 1                    | Relatively unimportant<br>Not at all feasible |
| 2                    | Somewhat important<br>Somewhat feasible       |
| 3                    | Moderately important<br>Moderately feasible   |
| 4                    | Very important<br>Very feasible               |
| 5                    | Extremely important<br>Extremely feasible     |

*Note.* The range of the x and y axes reflect the range of mean values obtained for all 73 of the discrete implementation strategies for each of the rating scales. The plot is divided into quadrants on the basis of the overall mean values for each of the rating scales. Different means are calculated for each identifying the quadrants of each of the plots where only from the ratings of the strategies that compose the cluster under analysis (above the divisions reflect the means for all 73 strategies). Strategies falling in Quadrant I fall above the mean for both the importance and the feasibility ratings. Thus, these strategies are those where there was highest consensus regarding their relative high importance and feasibility. Conversely, Quadrant III reflects the strategies where there was consensus regarding their relative low importance and feasibility. Quadrants II and IV reflect strategies that were relatively high in feasibility or importance, respectively, but low on the other rating scale.

# Go Zone-All

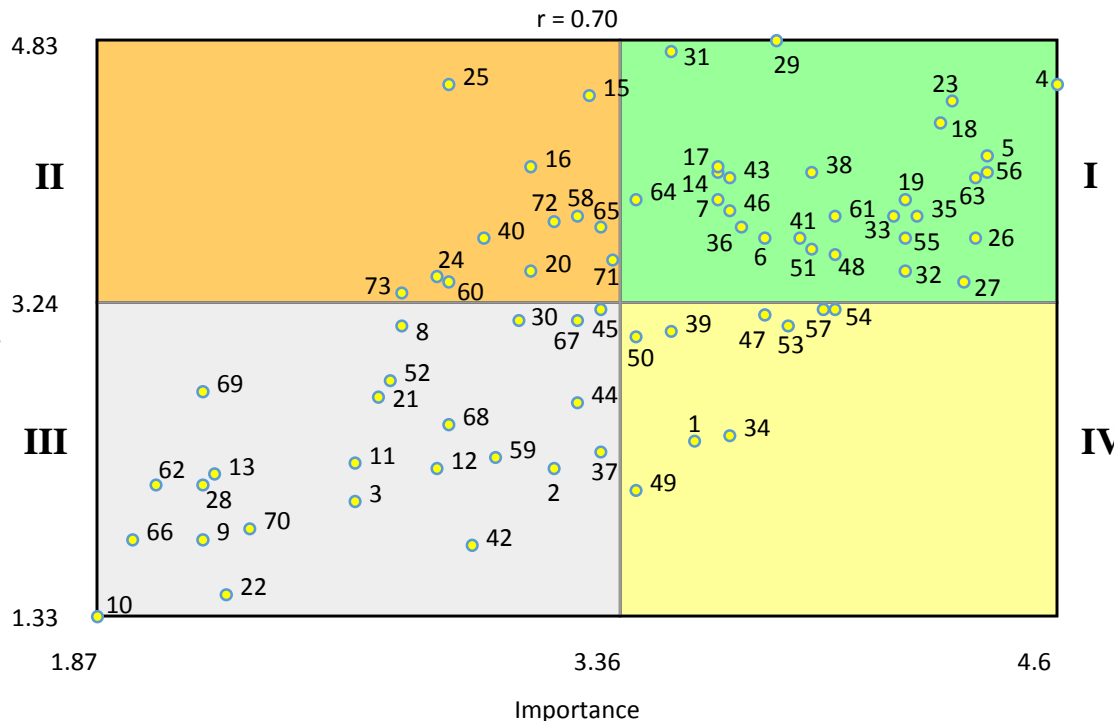

- 15. Conduct educational meetings
- 16. Conduct educational outreach visits
- 20. Create a learning collaborative
- 24. Develop academic partnerships
- 25. Develop an implementation glossary
- 40. Involve executive boards
- 58. Remind clinicians
- 60. Shadow other experts
- 65. Use an implementation advisor
- 71. Use train-the-trainer strategies
- 72. Visit other sites
- 73. Work with educational institutions

- 2. Alter incentive/allowance structures
- 3. Alter patient/consumer fees
- 8. Centralize technical assistance
- 9. Change accreditation or membership requirements
- 10. Change liability laws
- 11. Change physical structure and equipment
- 12. Change record systems
- 13. Change service sites
- 21. Create new clinical teams
- 22. Create or change credentialing and/or licensure standards
- 28. Develop disincentives
- 30. Develop resource sharing agreements
- 37. Increase demand
- 42. Make billing easier
- 44. Mandate change
- 45. Model and simulate change
- 52. Promote network weaving
- 59. Revise professional roles
- 62. Start a dissemination organization
- 66. Use capitated payments
- 67. Use data experts
- 68. Use data warehousing techniques
- 69. Use mass media
- 70. Use other payment schemes

- 1. Access new funding
- 34. Fund and contract for the clinical innovation
- 39. Intervene with patients/consumers to enhance uptake and adherence
- 47. Obtain formal commitments
- 49. Place innovation on fee for service lists/formularies
- 50. Prepare patients/consumers to be active participants
- 53. Provide clinical supervision
- 54. Provide local technical assistance
- 57. Recruit, designate, and train for leadership

- 4. Assess for readiness and identify barriers and facilitators
- 5. Audit and provide feedback
- 6. Build a coalition
- 7. Capture and share local knowledge
- 14. Conduct cyclical small tests of change
- 17. Conduct local consensus discussions
- 18. Conduct local needs assessment
- 19. Conduct ongoing training
- 23. Develop a formal implementation blueprint
- 26. Develop and implement tools for quality monitoring
- 27. Develop and organize quality monitoring systems
- 29. Develop educational materials
- 31. Distribute educational materials
- 32. Facilitate relay of clinical data to providers
- 33. Facilitation
- 35. Identify and prepare champions
- 36. Identify early adopters
- 38. Inform local opinion leaders
- 41. Involve patients/consumers and family members
- 43. Make training dynamic
- 46. Obtain and use patients/consumers and family feedback
- 48. Organize clinician implementation team meetings
- 51. Promote adaptability
- 55. Provide ongoing consultation
- 56. Purposefully reexamine the implementation
- 61. Stage implementation scale up
- 63. Tailor strategies
- 64. Use advisory boards and workgroups

# Relative Ratings by Cluster

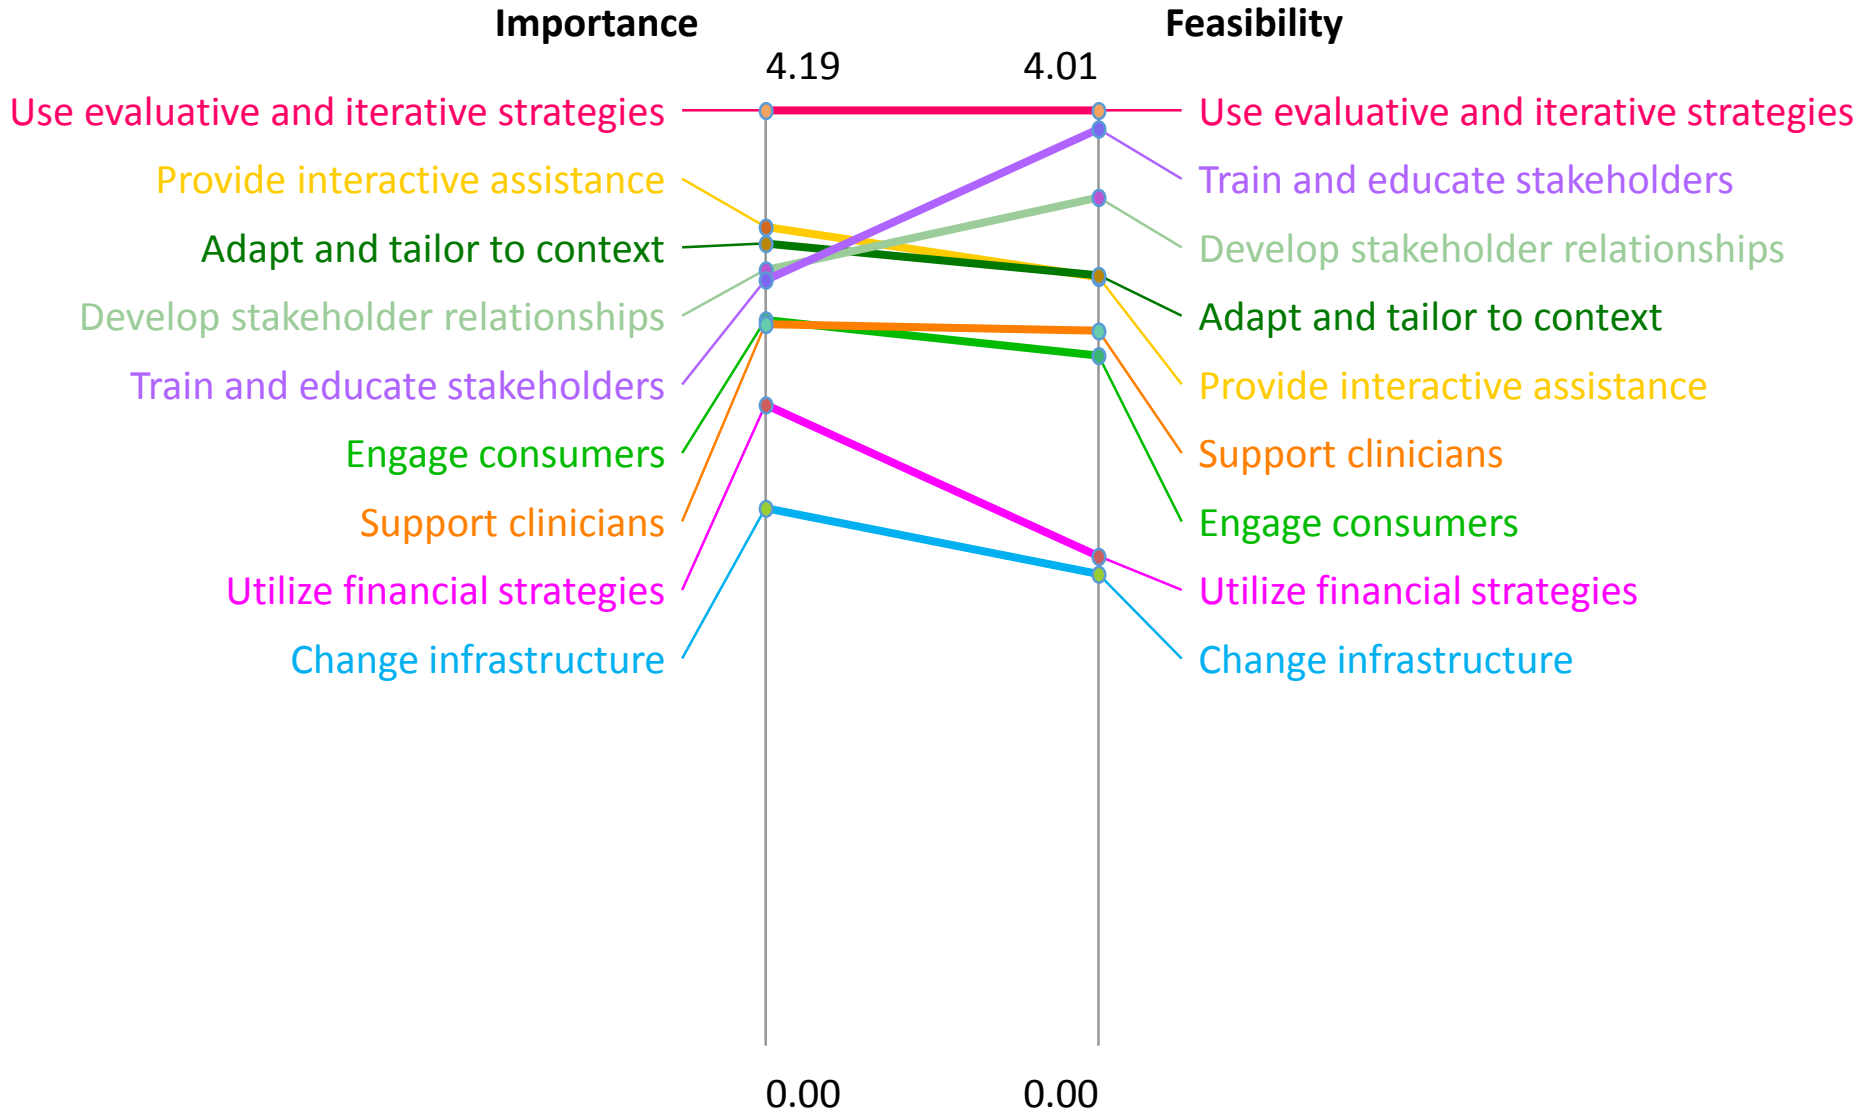

Supplement: MOESM1 [file 9773130]
